# Supplementary material
Source: PubMed Central journal article supplement (PMC1544207)

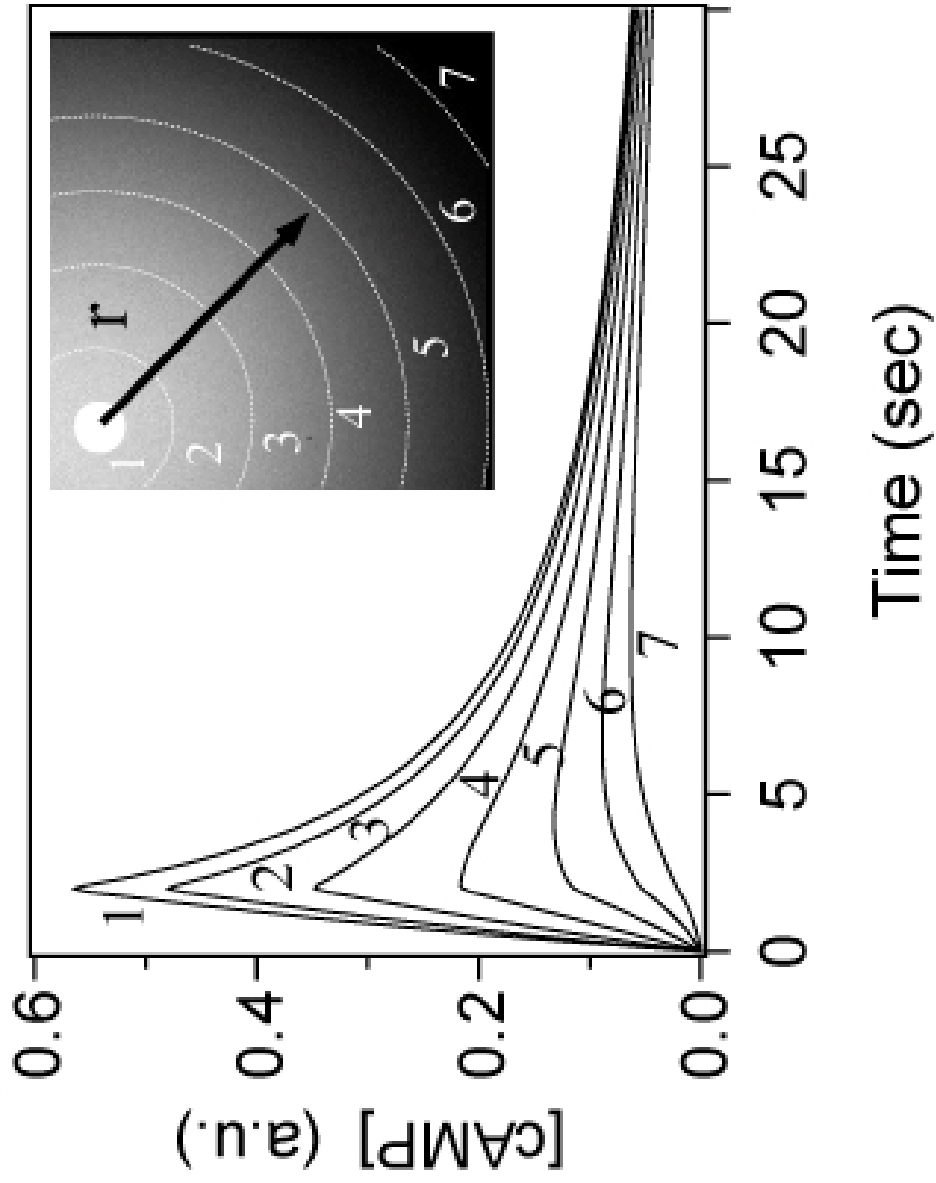

Supplement: pnas_0601909103_1.pdf [file pnas_0601909103_1.pdf]

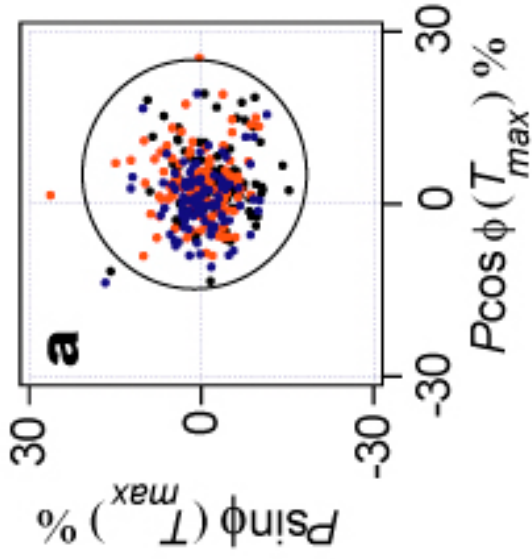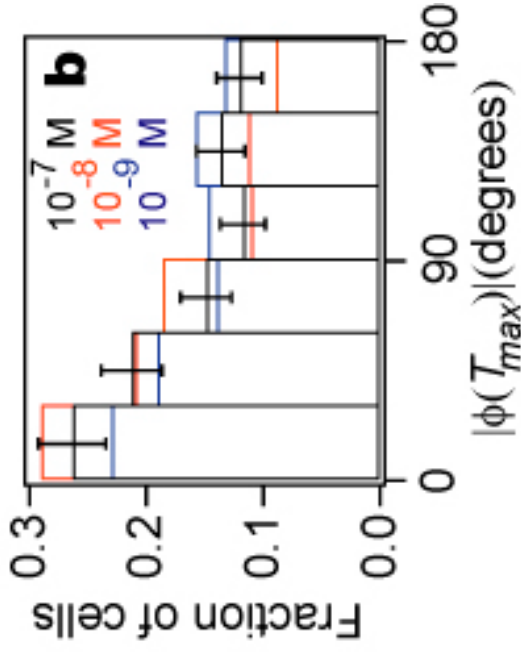

Supplement: pnas_0601909103_2.pdf [file pnas_0601909103_2.pdf]

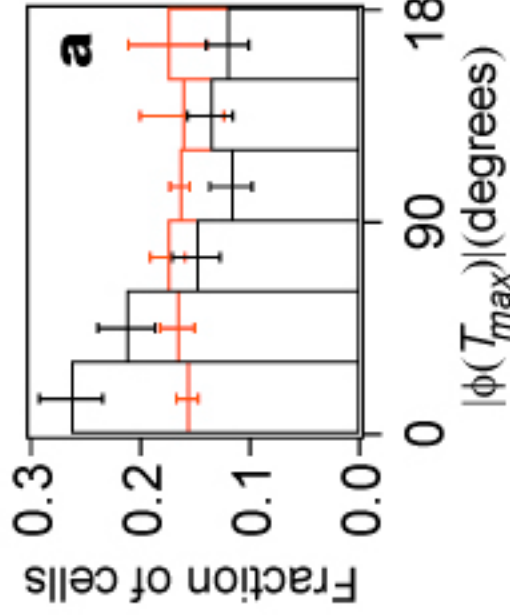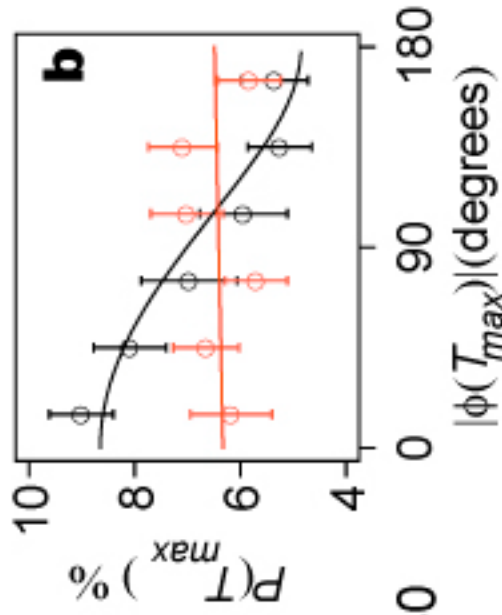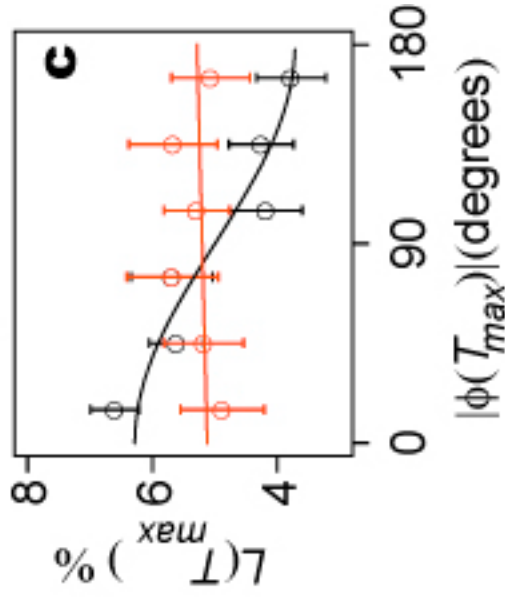

Supplement: pnas_0601909103_3.pdf [file pnas_0601909103_3.pdf]

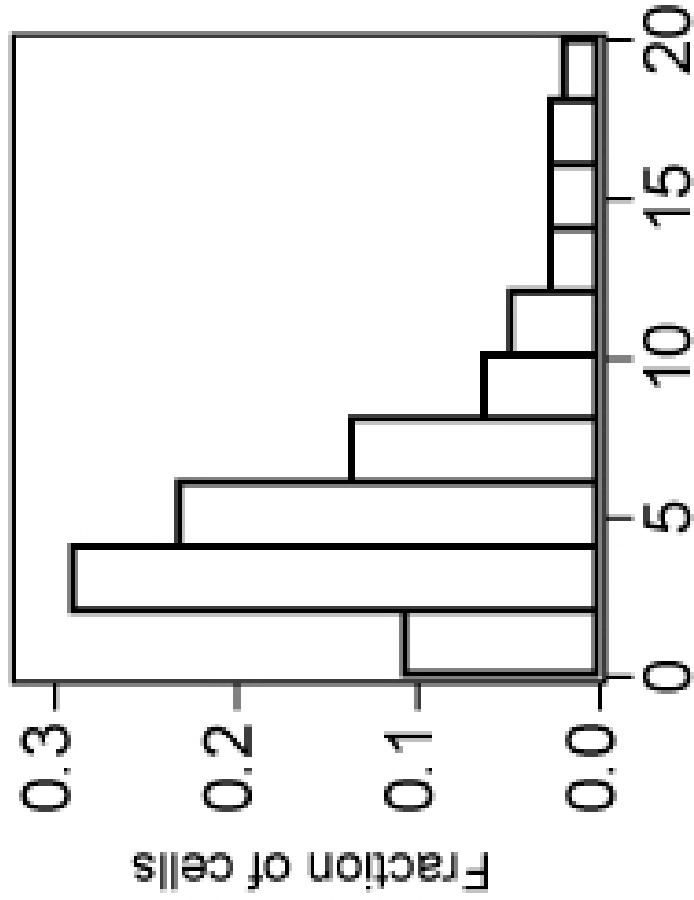

Magnitude of the internal signal ( $\epsilon$ ) a. u.

Supplement: pnas_0601909103_4.pdf [file pnas_0601909103_4.pdf]

UV spots

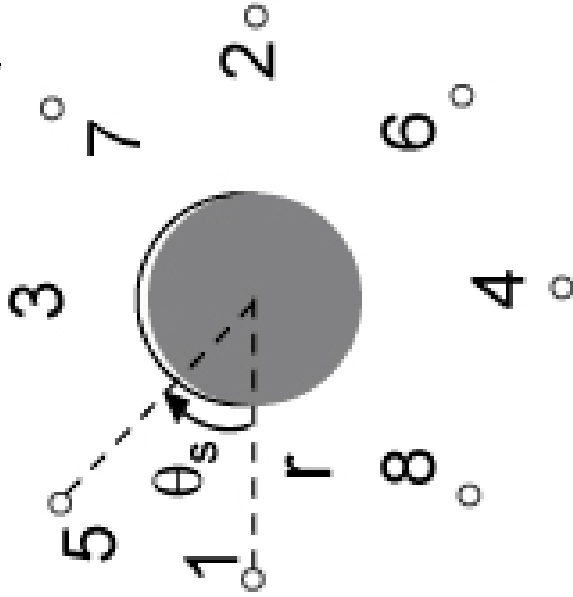

Supplement: pnas_0601909103_5.pdf [file pnas_0601909103_5.pdf]
